# Supplementary material for: The Effects of Different Degrees of Carbohydrate Restriction and Carbohydrate Replacement on Cardiometabolic Risk Markers in Humans—A Systematic Review and Meta-Analysis
Source: MDPI journal article supplement (doi:10.3390/nu12040991), 2020-04-02
Supplement: s1 [file s1]

**Table S1.** Changes in the compositions of the moderate low-carbohydrate diets (<45–40 E%).

| Author and year      | LCD vs. MCD        | Energy (kcal) | CHO (%) | Fiber (g) | Fat (%) | SFA (%) | MUFA (%) | PUFA (%) | Protein (%) | Chol (mg) |
|----------------------|--------------------|---------------|---------|-----------|---------|---------|----------|----------|-------------|-----------|
| Sato (19) 2017       | Isocaloric         | -277          | -7.3    |           | 5.6     | 3.2     | 0.8      | 0.7      | 2.7         |           |
| Larsen (20) 2011     | Isocaloric with ER | 75            | -5.2    | -1.4      | -0.7    | -0.9    | 0        | -0.3     | 6.6         | 53        |
| Parker (22) 2002     | Isocaloric with ER | 244           | -12     | -4.2      | 0.9     | 0.6     | 0.6      | -0.1     | 12          | 104       |
| Mehrabani (23) 2012  | Isocaloric         | -143          | -11     |           | -3.1    |         |          |          | 15          |           |
| Te Morenga (24) 2011 | Isocaloric with ER | 214           | -9.0    | -14       | 4.0     | 3.0     |          |          | 6.0         |           |
| Frisch (25) 2009     | Isocaloric with ER | -64           | -4.3    |           | 2.5     |         |          |          | 1.4         |           |
| Ebbeling (26) 2007   | Isocaloric         | 154           | -13     | -2.0      | 12      | 4.8     |          |          | -0.3        |           |
| De Natale (21) 2009  | Isocaloric         | -12           | -7.0    | -36       | 7.0     | 0       | 6.0      | 0.1      | 0           | 27        |
| Jacobs (27) 2004     | Isocaloric         | 48            | -11     |           | 11      | 3.5     | 5.0      | -2.1     | -0.3        | 15        |
| Pieke (28) 2000      | Isocaloric         | 81            | -14     | -1.2      | 12      | 0.9     | 5.0      | 4.7      | 1.6         | 29        |
| Vidon (29) 2001      | Isocaloric         |               | -14     |           | 13      |         |          |          | 1.1         | 21        |
| Ashton (30) 2000     | Isocaloric         | 300           | -14     | 0.6       | 16      | 0.6     | 16       | -0.4     | 0.8         | -8.0      |
| Wolfe (31) 1999      | Isocaloric         | 23            | -10     | -2.1      | 0       |         |          |          | 10          | 1.0       |

Abbreviations: LCD, low carbohydrate diet; MCD, moderate carbohydrate diet; CHO, carbohydrate; SFA, saturated fatty acid; Chol, cholesterol; ER, energy restriction.

**Table S2.** Changes in the compositions of the low-carbohydrate diets (<40–30 E%).

| Author and year       | LCD vs. MCD              | Energy (kcal) | CHO (%) | Fiber (g) | Fat (%) | SFA (%) | MUF A (%) | PUFA (%) | Protein (%) | Chol (mg) |
|-----------------------|--------------------------|---------------|---------|-----------|---------|---------|-----------|----------|-------------|-----------|
| Yamada (32) 2014      | <i>Ad libitum</i> vs. ER | 24            | -21     |           | 13      |         |           |          | 8.7         |           |
| Luger (33) 2013       | Isocaloric               | 44            | -13     | 3.3       | 6.7     |         |           |          | 5.9         |           |
| Guldbrand (34) 2012   | Isocaloric with ER       | -189          | -9.0    |           | 6.0     | 3.0     | 3.1       | 1.9      | 4.0         |           |
| Davis (35) 2009       | Isocaloric               | -288          | -19     | -2.6      | 16      | 1.4     | 4.1       | -0.2     | 3.7         |           |
| Klemsdal (36) 2010    | Isocaloric with ER       |               | -8.1    |           | 5       |         |           |          | 2.5         |           |
| Gardner (38) 2018     | Isocaloric               | -94           | -18     | -4.4      | 15      | 5.1     | -2.1      |          | 1.9         |           |
| Bazzano (39) 2014     | Isocaloric with ER       | -43           | -22     | -2.1      | 13      | 5.5     | 4.7       | 1.9      | 5.3         | 0         |
| Abete (40) 2009       | Isocaloric with ER       |               | -19     | -4.5      | 4.2     | 9.3     | -2.3      | 0.4      | 11          | 257       |
| Gardner (41) 2007 [1] | <i>Ad libitum</i> vs. ER | 92            | -9.4    | -1.1      | 9.2     | 2.8     |           |          | -0.4        |           |
| Gardner (41) 2007 [2] | Isocaloric               | 56            | -16     | -4.9      | 13      | 4.6     |           |          | 2.0         |           |
| Brehm (42) 2003       | <i>Ad libitum</i> vs. ER | 154           | -23     | -3.5      | 18      | 6.2     | 8.5       | 4.1      | 4.0         | 162       |

|                         |                             |      |     |      |     |     |     |      |      |     |
|-------------------------|-----------------------------|------|-----|------|-----|-----|-----|------|------|-----|
| Stern (43)<br>2004      | <i>Ad libitum</i><br>vs. ER | -413 | -16 |      | 25  | 3.6 |     |      | 0.7  |     |
| Samaha (44)<br>2003     | <i>Ad libitum</i><br>vs. ER | -188 | -12 |      | 8.0 |     |     |      | 5.0  |     |
| Hu (45)<br>2015         | Isocaloric<br>with ER       | -43  | -22 | -2.3 | 13  | 5.5 | 4.7 |      | 5.3  |     |
| Brynes (37)<br>2003 [1] | Isocaloric                  | 449  | -11 | 3.0  | 11  |     | 6.1 |      | -2.0 |     |
| Brynes (37)<br>2003 [2] | Isocaloric                  | 736  | -11 | -9.0 | 14  |     | 7.1 |      | -3.0 |     |
| Brynes (37)<br>2003 [3] | Isocaloric                  | 239  | -15 | 3.0  | 14  |     | 7.1 |      | -1.0 |     |
| Straznicky (46)<br>1999 | Isocaloric                  | 449  | -18 | -11  | 22  | 19  | 8.3 | -5.8 | -2.9 | 343 |
| Borkman (47)<br>1991    | Isocaloric                  | 287  | -24 | -23  | 30  | 15  | 13  | 1.4  | -6.1 | 280 |

Abbreviations: LCD, low carbohydrate diet; MCD, moderate carbohydrate diet; CHO, carbohydrate; SFA, saturated fatty acid; Chol, cholesterol; ER, energy restriction.

**Table S3.** Changes in the compositions of the very low-carbohydrate diets (<30–3 E%).

| Author and year           | LCD vs. MCD                 | Energy (kcal) | CHO (%) | Fiber (g) | Fat (%) | SFA (%) | MUFA (%) | PUFA (%) | Protein (%) | Chol (mg) |
|---------------------------|-----------------------------|---------------|---------|-----------|---------|---------|----------|----------|-------------|-----------|
| Tay (49)<br>2015          | Isocaloric<br>with ER       | -37           | -32     | -5.7      | 26      | 2.5     | 17       | 6.9      | 7.2         | 119       |
| Brehm (50)<br>2005        | <i>Ad libitum</i><br>vs. ER | 119           | -21     |           | 19      |         |          |          | 2.0         |           |
| Veum (51)<br>2017         | Isocaloric                  | 245           | -39     | -12       | 40      | 19      | 13       | 0.5      | -0.6        | 371       |
| Brinkworth (52)<br>2009   | Isocaloric<br>with ER       | 20            | -38     |           | 29      | 14      | 12       | 1.2      | 11          | 443       |
| Stoernell (53)<br>2008    | Isocaloric                  | -145          | -27     |           | 21      | 3.0     |          |          | 2.0         |           |
| Ranjan (48)<br>2017       | Isocaloric                  | -160          | -40     |           | 31      |         |          |          | 9.2         |           |
| Holloway (54)<br>2011     | Isocaloric                  | -31           | -45     |           | 47      |         |          |          | -2.0        |           |
| Chokkalingam<br>(55) 2007 | Isocaloric                  | 215           | -42     |           | 44      |         |          |          | 0           |           |

Abbreviations: LCD, low carbohydrate diet; MCD, moderate carbohydrate diet; CHO, carbohydrate; SFA, saturated fatty acid; Chol, cholesterol; ER, energy restriction.

**Table S4.** Effect of health status on cardiovascular disease (CVD) risk markers.

| Risk marker           | Categories *     | Difference WMD $\pm$ SEM | Lower 95% CI | Upper 95% CI | p-value |
|-----------------------|------------------|--------------------------|--------------|--------------|---------|
| Weight (kg)           | Overweight/obese | -1.82 $\pm$ 0.84         | -3.53        | -0.10        | 0.039   |
|                       | Metab. impaired  | -0.30 $\pm$ 0.73         | -1.80        | 1.20         | 0.685   |
| Total chol. (mmol/l)  | Overweight/obese | -0.27 $\pm$ 0.19         | -0.67        | 0.12         | 0.172   |
|                       | Metab. impaired  | -0.32 $\pm$ 0.17         | -0.67        | 0.03         | 0.072   |
| LDL-C (mmol/l)        | Overweight/obese | 0.22 $\pm$ 0.15          | -0.52        | 0.08         | 0.144   |
|                       | Metab. impaired  | -0.31 $\pm$ 0.14         | -0.59        | -0.03        | 0.033   |
| HDL-C (mmol/l)        | Overweight/obese | -0.05 $\pm$ 0.05         | -0.15        | 0.06         | 0.367   |
|                       | Metab. impaired  | -0.06 $\pm$ 0.05         | -0.15        | 0.04         | 0.254   |
| TAG (mmol/l)          | Overweight/obese | -0.07 $\pm$ 0.09         | -0.23        | 0.11         | 0.444   |
|                       | Metab. impaired  | -0.15 $\pm$ 0.08         | -0.32        | 0.01         | 0.064   |
| Glucose (mmol/l)      | Overweight/obese | -0.19 $\pm$ 0.32         | -0.86        | 0.47         | 0.556   |
|                       | Metab. impaired  | -0.56 $\pm$ 0.31         | -1.21        | 0.08         | 0.083   |
| Insulin ( $\mu$ U/ml) | Overweight/obese | 0.09 $\pm$ 1.90          | -3.90        | 4.08         | 0.961   |
|                       | Metab. impaired  | -0.02 $\pm$ 2.35         | -4.95        | 4.91         | 0.993   |
| Systolic BP (mmHg)    | Overweight/obese | -6.98 $\pm$ 2.62         | -12.4        | -1.53        | 0.015   |
|                       | Metab. impaired  | -3.90 $\pm$ 2.62         | -9.36        | 1.55         | 0.152   |
| Diastolic BP (mmHg)   | Overweight/obese | -2.33 $\pm$ 2.14         | -6.78        | 2.12         | 0.288   |

|                 |              |       |      |       |
|-----------------|--------------|-------|------|-------|
| Metab. impaired | -1.67 ± 2.14 | -6.12 | 2.78 | 0.443 |
|-----------------|--------------|-------|------|-------|

\* Changes in overweight/obese and metabolically impaired participants were compared to those in healthy participants as reference category. Abbreviations: WMD, weighted mean differences; Metab., metabolically.

**Table S5.** Effect of changes in weight loss on cardiovascular disease (CVD) risk markers \*.

| Risk marker          | Difference<br>WMD ± SEM | Lower<br>95% CI | Upper<br>95% CI | p-value |
|----------------------|-------------------------|-----------------|-----------------|---------|
| Total chol. (mmol/L) | 0.08 ± 0.15             | -0.22           | 0.38            | 0.597   |
| LDL-C (mmol/L)       | 0.04 ± 0.11             | -0.18           | 0.26            | 0.714   |
| HDL-C (mmol/L)       | -0.02 ± 0.03            | -0.08           | 0.05            | 0.573   |
| TAG (mmol/L)         | 0.10 ± 0.06             | -0.02           | 0.22            | 0.094   |
| Glucose (mmol/L)     | 0.24 ± 0.15             | -0.06           | 0.55            | 0.114   |
| Insulin (μU/mL)      | 0.76 ± 1.52             | -2.53           | 4.05            | 0.626   |
| Systolic BP (mmHg)   | 2.79 ± 1.46             | -0.28           | 5.85            | 0.072   |
| Diastolic BP (mmHg)  | 2.42 ± 1.18             | -0.05           | 4.88            | 0.054   |

\* The median change in weight loss (-0.85 kg) was used as stratification variable to create two subgroups (subgroup 1 ≤ median change vs. subgroup 2 > median change). Abbreviations: WMD, weighted mean differences.

**Table S6.** Effect of changes in saturated fatty acid (SFA) intake on cardiovascular disease (CVD) risk markers\*.

| Risk marker          | Difference WMD ± SEM | Lower<br>95% CI | Upper<br>95% CI | p-value |
|----------------------|----------------------|-----------------|-----------------|---------|
| Weight (kg)          | -1.62 ± 0.84         | -3.39           | 0.14            | 0.069   |
| Total chol. (mmol/L) | 0.50 ± 0.18          | 0.13            | 0.87            | 0.011   |
| LDL-C (mmol/L)       | 0.29 ± 0.11          | 0.06            | 0.52            | 0.015   |
| HDL-C (mmol/L)       | 0.09 ± 0.04          | 0.01            | 0.17            | 0.037   |
| TAG (mmol/L)         | -0.09 ± 0.05         | -0.19           | 0.02            | 0.107   |
| Glucose (mmol/L)     | -0.10 ± 0.16         | -0.46           | 0.26            | 0.558   |
| Insulin (μU/mL)      | -0.07 ± 1.33         | -2.97           | 2.84            | 0.961   |
| Systolic BP (mmHg)   | 0.50 ± 1.92          | -3.56           | 4.57            | 0.796   |
| Diastolic BP (mmHg)  | 0.83 ± 1.43          | -2.19           | 3.86            | 0.566   |

\* The median change in SFA intake (3.5 E%) was used as stratification variable to create two subgroups (subgroup 1 ≤ median change vs. subgroup 2 > median change). Abbreviations: WMD, weighted mean differences.

**Table S7.** Effect of changes in protein-intake on cardiovascular disease (CVD) risk markers \*.

| Risk marker          | Difference<br>WMD ± SEM | Lower<br>95% CI | Upper<br>95% CI | p-value |
|----------------------|-------------------------|-----------------|-----------------|---------|
| Weight (kg)          | -1.01 ± 0.66            | -2.36           | 0.34            | 0.138   |
| Total chol. (mmol/L) | -0.22 ± 0.12            | -0.47           | 0.03            | 0.085   |
| LDL-C (mmol/L)       | -0.18 ± 0.08            | -0.34           | -0.01           | 0.038   |
| HDL-C (mmol/L)       | -0.04 ± 0.03            | -0.10           | 0.02            | 0.220   |
| TAG (mmol/L)         | -0.01 ± 0.05            | -0.12           | 0.09            | 0.787   |
| Glucose (mmol/L)     | -0.26 ± 0.12            | -0.51           | -0.01           | 0.042   |
| Insulin (μU/mL)      | -0.75 ± 1.07            | -3.00           | 1.50            | 0.493   |
| Systolic BP (mmHg)   | 1.02 ± 1.56             | -2.22           | 4.26            | 0.519   |
| Diastolic BP (mmHg)  | -1.03 ± 1.15            | -3.42           | 1.37            | 0.383   |

\* The median change in protein intake (2.0 E%) was used as stratification variable to create two subgroups (subgroup 1 ≤ median change vs. subgroup 2 > median change). Abbreviations: WMD, weighted mean differences.

**Table S8.** Effect of study design on cardiovascular disease (CVD) risk markers \*.

| Risk marker          | Difference WMD ± SEM | Lower<br>95% CI | Upper<br>95% CI | p-value |
|----------------------|----------------------|-----------------|-----------------|---------|
| Weight (kg)          | 1.57 ± 0.65          | 0.25            | 2.89            | 0.021   |
| Total chol. (mmol/L) | 0.14 ± 0.13          | -0.12           | 0.41            | 0.278   |
| LDL-C (mmol/L)       | 0.09 ± 0.09          | -0.10           | 0.28            | 0.351   |

|                     |             |       |      |       |
|---------------------|-------------|-------|------|-------|
| HDL-C (mmol/L)      | 0.00 ± 0.03 | -0.07 | 0.08 | 0.895 |
| TAG (mmol/L)        | 0.08 ± 0.05 | -0.02 | 0.19 | 0.114 |
| Glucose (mmol/L)    | 0.18 ± 0.13 | -0.08 | 0.44 | 0.166 |
| Insulin (μU/mL)     | 0.58 ± 1.05 | -1.61 | 2.78 | 0.584 |
| Systolic BP (mmHg)  | 4.39 ± 2.24 | -0.25 | 9.04 | 0.063 |
| Diastolic BP (mmHg) | 1.81 ± 1.63 | -1.57 | 5.19 | 0.278 |

\* Changes in cross-over-designed studies were compared to those in parallel-designed studies as reference. Abbreviations: WMD, weighted mean differences.

**Table S9.** Effect of study duration on cardiovascular disease (CVD) risk markers.

| Risk marker          | Categories* | WMD<br>± SEM | Lower 95% CI | Upper<br>95% CI | p-value |
|----------------------|-------------|--------------|--------------|-----------------|---------|
| Weight (kg)          | >1 month    | -1.37 ± 0.75 | -2.91        | 0.17            | 0.078   |
|                      | >6 months   | -0.92 ± 0.79 | -2.53        | 0.69            | 0.253   |
| Total chol. (mmol/L) | >1 month    | -0.21 ± 0.16 | -0.54        | 0.11            | 0.189   |
|                      | >6 months   | -0.14 ± 0.17 | -0.49        | 0.21            | 0.415   |
| LDL-C (mmol/L)       | >1 month    | 0.23 ± 0.12  | -0.48        | 0.01            | 0.058   |
|                      | >6 months   | -0.15 ± 0.12 | -0.40        | 0.10            | 0.228   |
| HDL-C (mmol/L)       | >1 month    | -0.06 ± 0.04 | -0.15        | 0.02            | 0.113   |
|                      | >6 months   | -0.01 ± 0.04 | -0.10        | 0.70            | 0.113   |
| TAG (mmol/L)         | >1 month    | -0.14 ± 0.07 | -0.28        | 0.01            | 0.058   |
|                      | >6 months   | -0.11 ± 0.07 | -0.26        | 0.04            | 0.145   |
| Glucose (mmol/L)     | >1 month    | -0.40 ± 0.29 | -1.01        | 0.21            | 0.185   |
|                      | >6 months   | 0.12 ± 0.30  | -0.51        | 0.74            | 0.701   |
| Insulin (μU/mL)      | >1 month    | -2.63 ± 1.76 | -6.32        | 1.07            | 0.153   |
|                      | >6 months   | 0.44 ± 1.79  | -3.33        | 4.21            | 0.810   |
| Syst. BP (mmHg)      | >1 month    | -5.17 ± 2.52 | -10.4        | 0.07            | 0.053   |
|                      | >6 months   | -3.31 ± 2.39 | -8.28        | 1.65            | 0.179   |
| Diast. BP (mmHg)     | >1 month    | -2.28 ± 1.85 | -6.14        | 1.58            | 0.233   |
|                      | >6 months   | -0.88 ± 1.75 | -4.52        | 2.77            | 0.623   |

\* Study durations of >1 month and >6 months were compared to study durations of ≤ 1 month as reference category. Abbreviations: WMD, weighted mean differences.

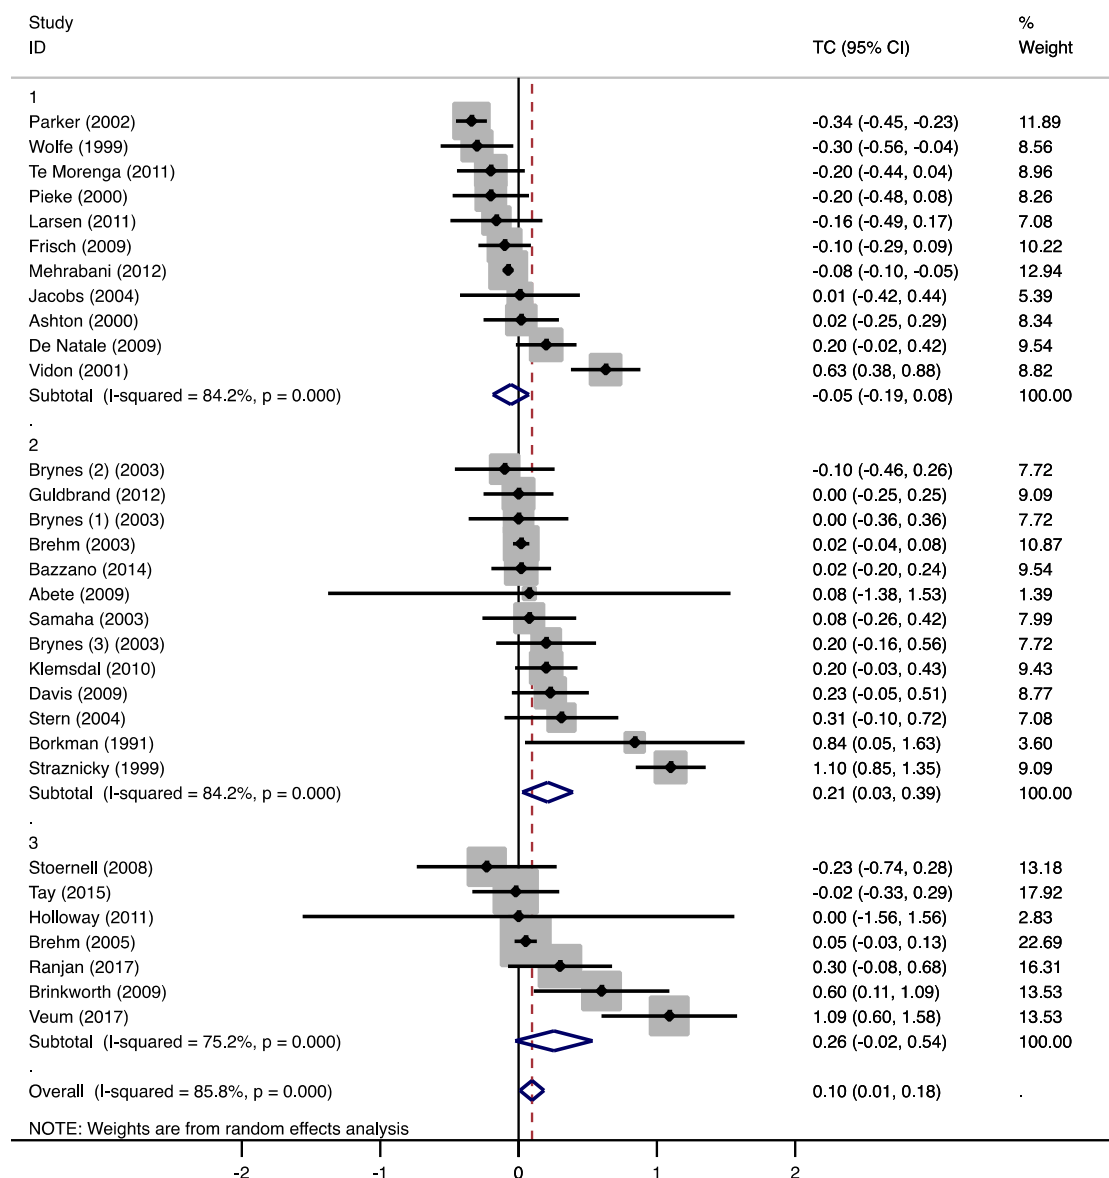

**Figure S1A.** Forest plots of randomized controlled trials that examined the effects of carbohydrate (CHO) restriction on total cholesterol concentrations. Studies were categorized in group 1 (moderate-low CHO, 40–45 E%), group 2 (low CHO, 40–30 E%), and group 3 (very-low CHO, 30–3 E%). Solid squares represent the weight of individual studies and diamonds represent the weighted mean difference (WMD) in total cholesterol. Effects were calculated using random-effect meta-analysis. No significant differences in total cholesterol were detected between the low-carbohydrate diet (LCD) groups.

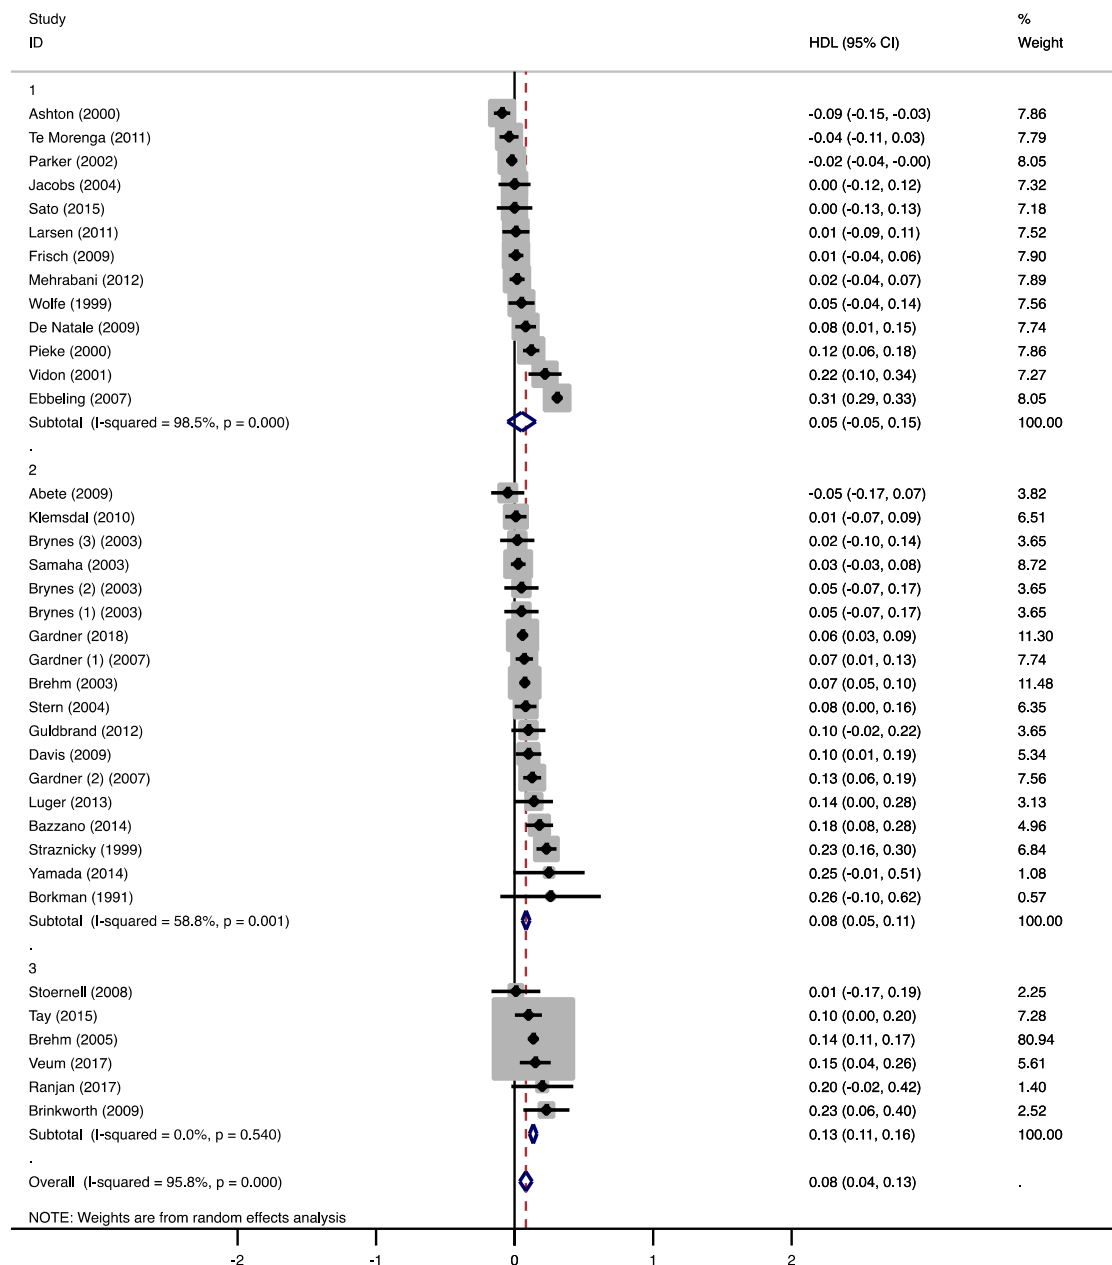

**Figure S1B.** Forest plots of randomized controlled trials that examined the effects of carbohydrate (CHO) restriction on HDL-C concentrations. Studies were categorized in group 1 (moderate-low CHO, 40–45 E%), group 2 (low CHO, 40–30 E%), and group 3 (very-low CHO, 30–3 E%). Solid squares represent the weight of individual studies and diamonds represent the weighted mean difference (WMD) in HDL-C. Effects were calculated using random-effect meta-analysis. No significant differences in HDL-C were detected between the low-carbohydrate diet (LCD) groups.

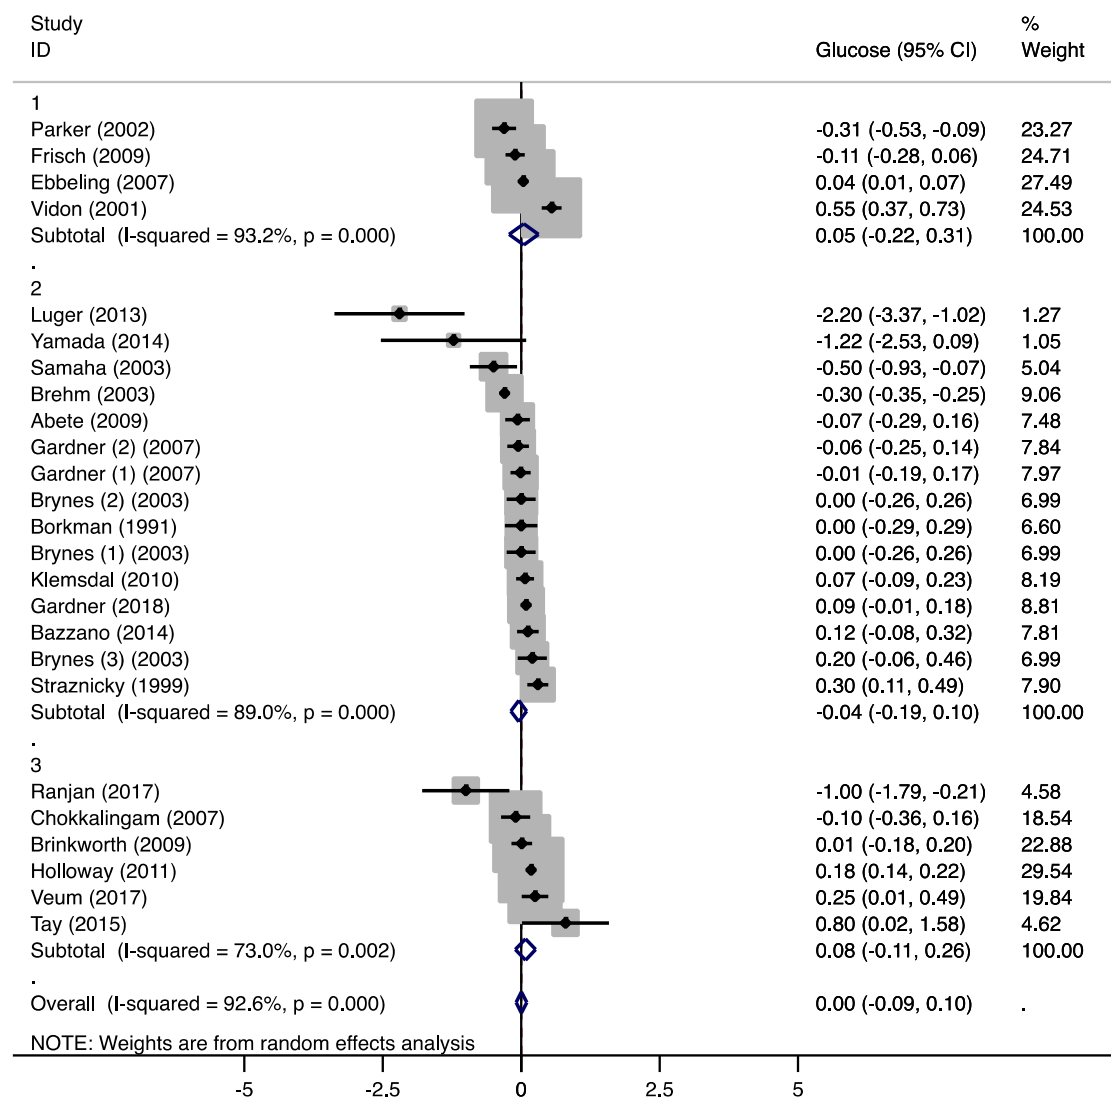

**Figure S1C.** Forest plots of randomized controlled trials that examined the effects of carbohydrate (CHO) restriction on plasma glucose concentrations. Studies were categorized in group 1 (moderate-low CHO, 40–45 E%), group 2 (low CHO, 40–30 E%), and group 3 (very-low CHO, 30–3 E%). Solid squares represent the weight of individual studies and diamonds represent the weighted mean difference (WMD) in glucose. Effects were calculated using random-effect meta-analysis. No significant differences in glucose were detected between the low-carbohydrate diet (LCD) groups.

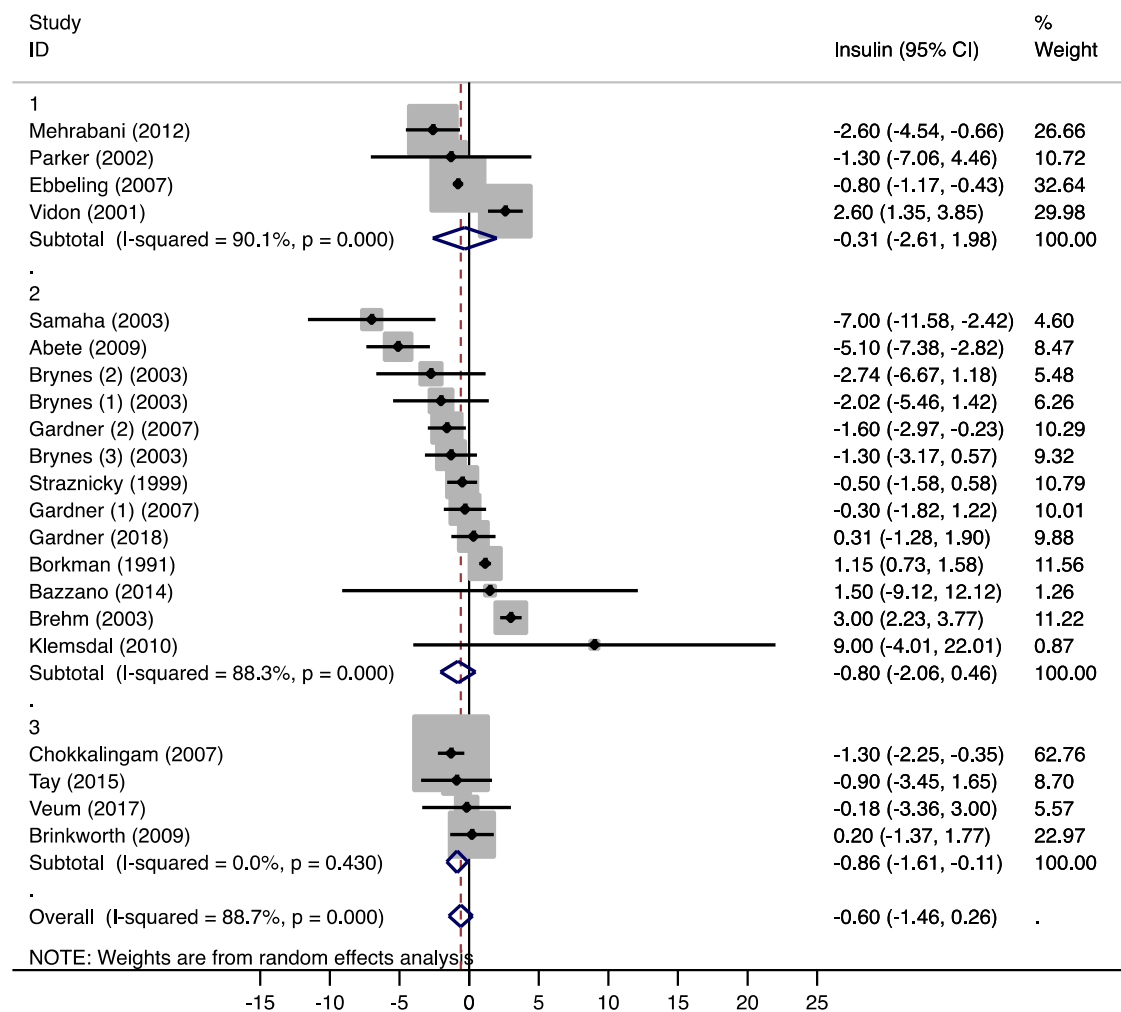

**Figure S1D.** Forest plots of randomized controlled trials that examined the effects of carbohydrate (CHO) restriction on serum insulin concentrations. Studies were categorized in group 1 (moderate-low CHO, 40–45 E%), group 2 (low CHO, 40–30 E%), and group 3 (very-low CHO, 30–3 E%). Solid squares represent the weight of individual studies and diamonds represent the weighted mean difference (WMD) in insulin concentrations. Effects were calculated using random-(effect) meta-analysis. No significant differences in insulin were detected between the low-carbohydrate diet (LCD) groups.



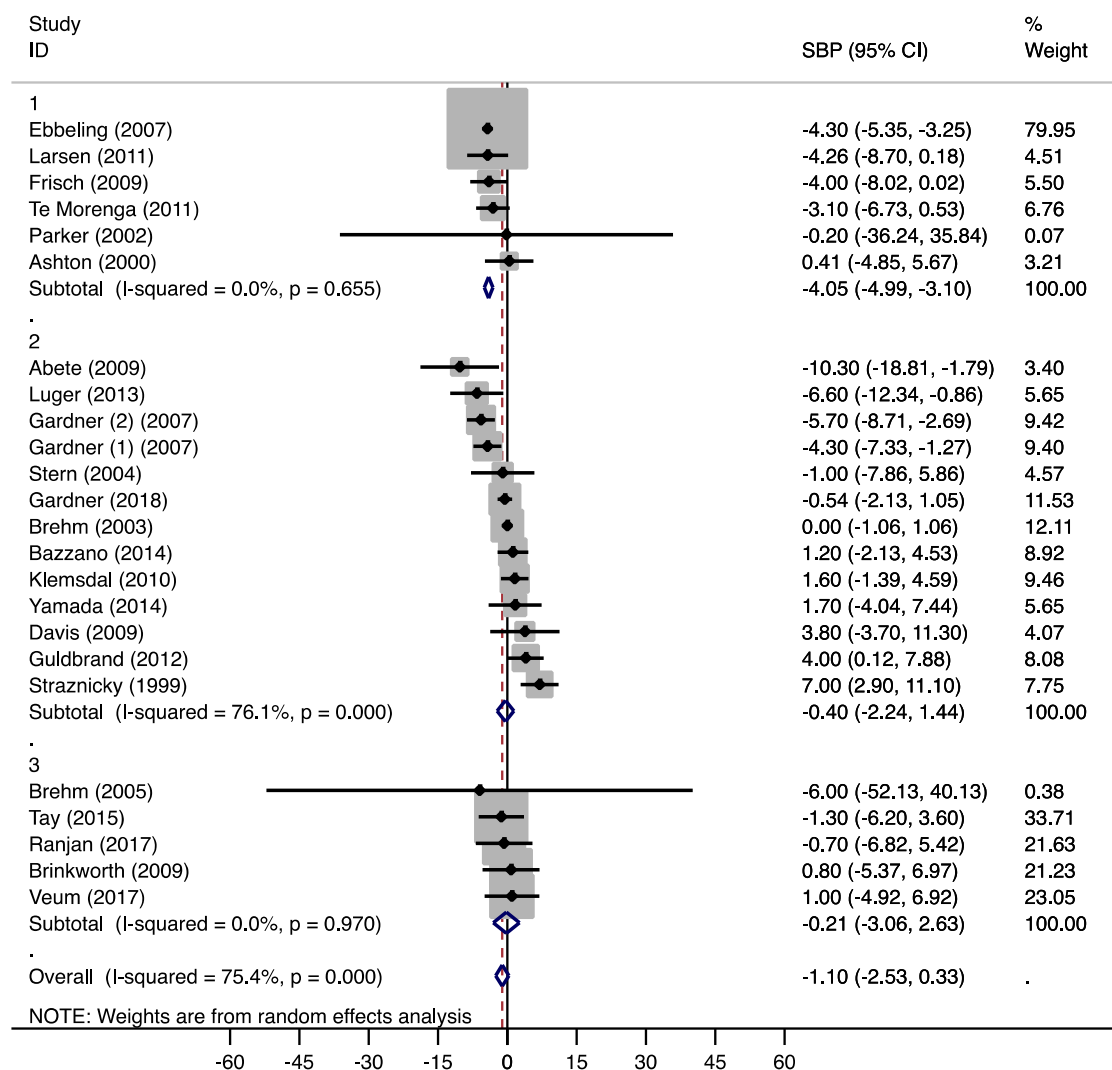

**Figure S1E.** Forest plots of randomized controlled trials that examined the effects of carbohydrate (CHO) restriction on systolic blood pressure. Studies were categorized in group 1 (moderate-low CHO, 40–45 E%), group 2 (low CHO, 40–30 E%), and group 3 (very-low CHO, 30–3 E%). Solid squares represent the weight of individual studies and diamonds represent the weighted mean difference (WMD) in systolic BP. Effects were calculated using random-effect meta-analysis. No significant differences in systolic BP were detected between the low-carbohydrate diet (LCD) groups.

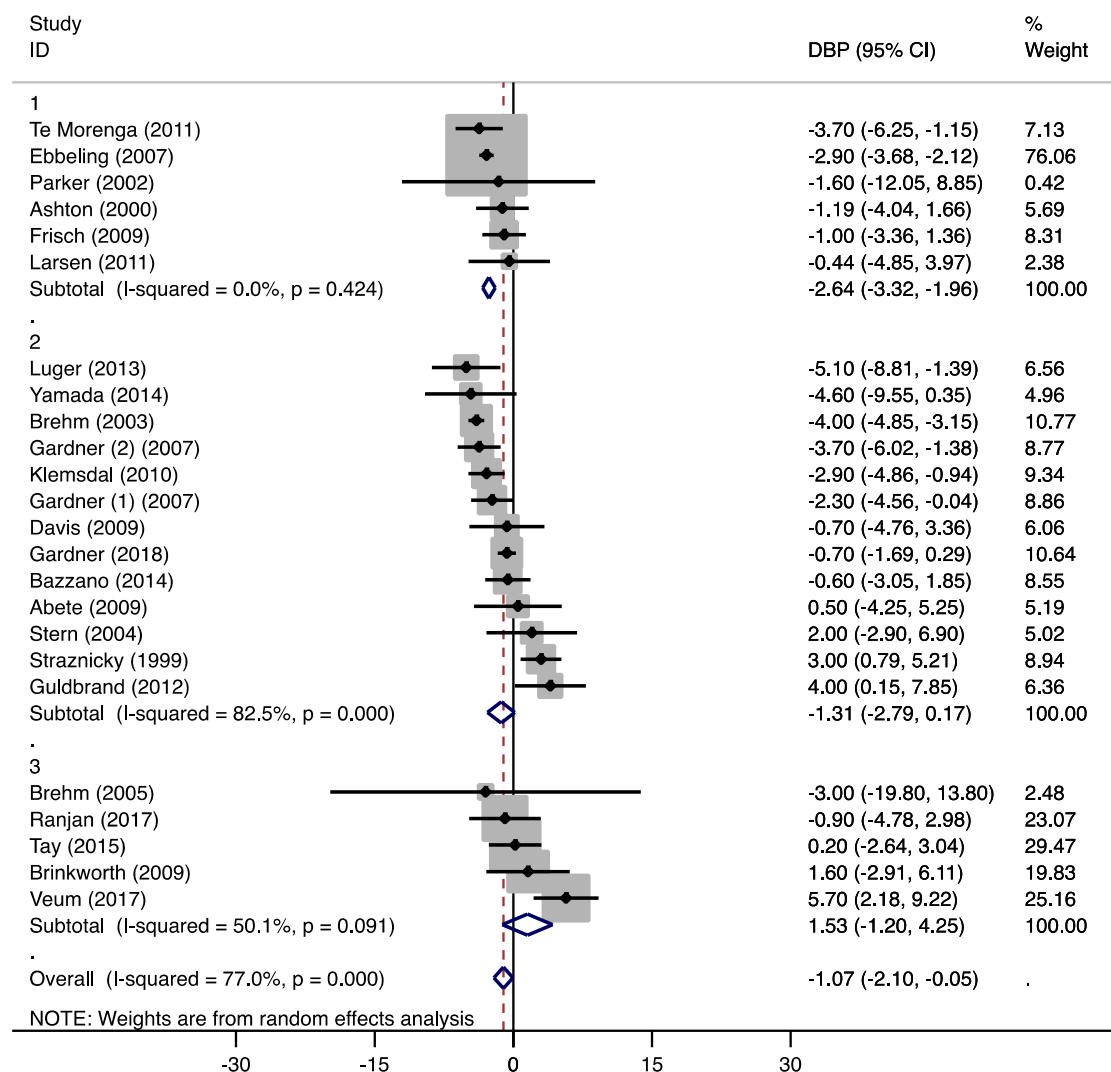

**Figure S1F.** Forest plots of randomized controlled trials that examined the effects of carbohydrate (CHO) restriction on diastolic blood pressure. Studies were categorized in group 1 (moderate-low CHO, 40–45 E%), group 2 (low CHO, 40–30 E%), and group 3 (very-low CHO, 30–3 E%). Solid squares represent the weight of individual studies and diamonds represent the weighted mean difference (WMD) in diastolic BP. Effects were calculated using random-effect meta-analysis. No significant differences in diastolic BP were detected between the low-carbohydrate diet (LCD) groups.

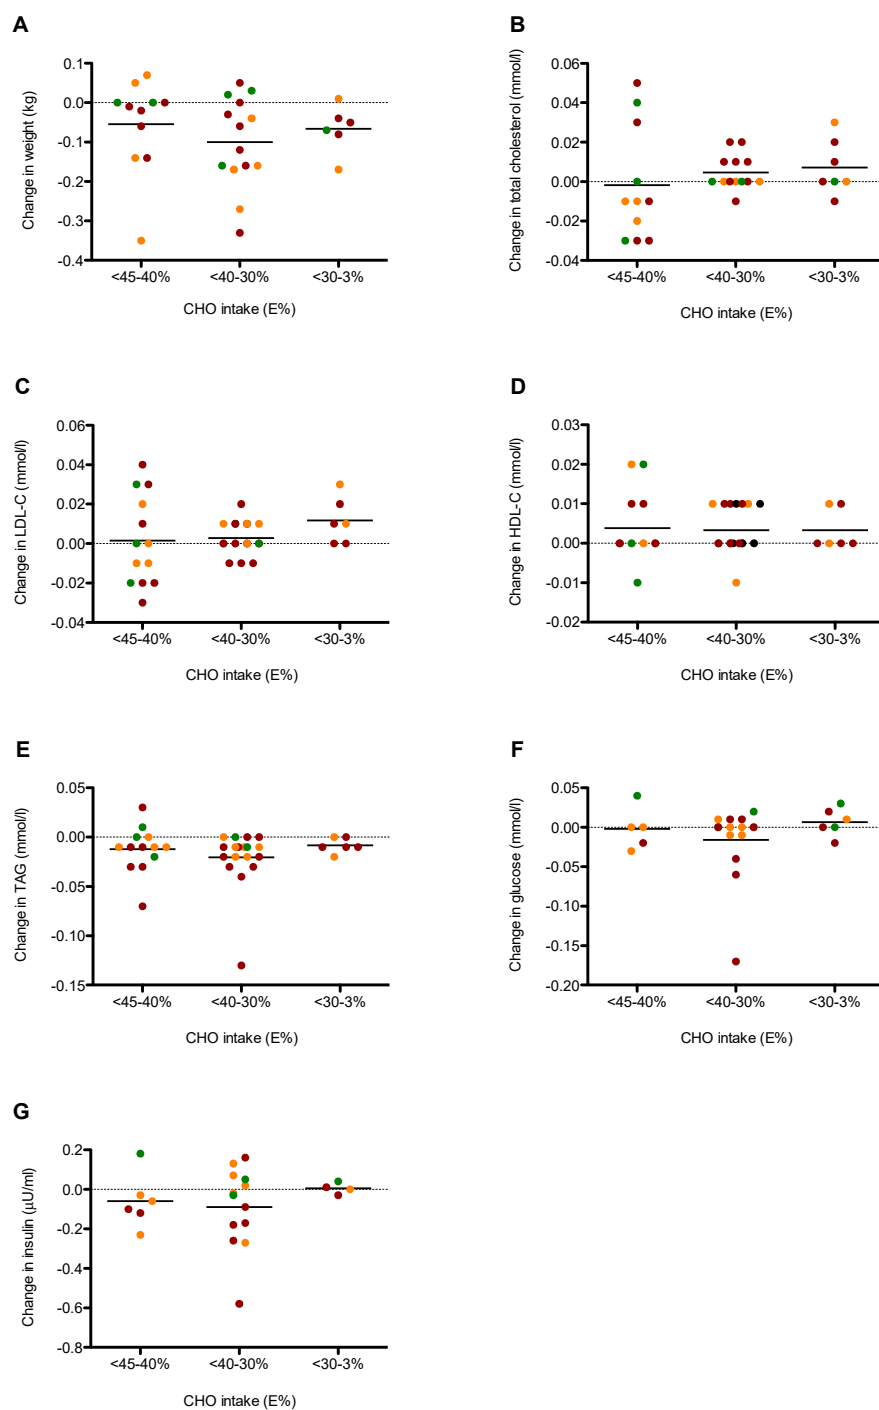

**Figure S2.** Comparison of the diet effects of the moderate-low (<45–40 E%), low (<40–30 E%), and very low (<30–3 E%) carbohydrate (CHO) groups on (A) weight, (B) total cholesterol, (C) LDL-cholesterol, (D) HDL-cholesterol, (E) triacylglycerol, (F) glucose, and (G) insulin. Data is expressed as mean changes per percentage reduction in carbohydrates. Significant results are represented by squares. The health status of the study population is indicated in green (healthy), orange (overweight/obese), and red (metabolically impaired, including type 2 diabetes and metabolic syndrome).

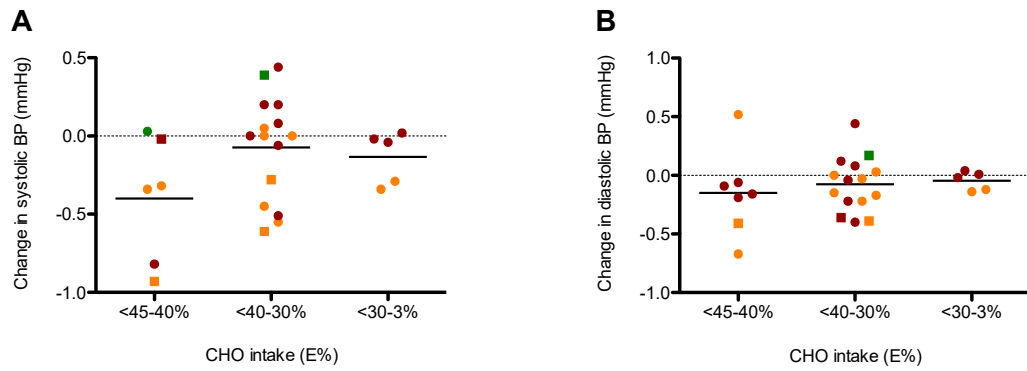

**Figure S3.** Comparison of the diet effects of the moderate low (<45–40 E%), low (<40–30 E%), and very low (<30–3 E%) carbohydrate (CHO) groups on (A) systolic and (B) diastolic blood pressure. Data is expressed as mean changes per percentage reduction in carbohydrates. Significant results are represented by squares. The health status of the study population is indicated in green (healthy), orange (overweight/obese), and red (metabolically impaired including type 2 diabetes and metabolic syndrome).
